# Supplementary material for: An altered hydrotropic response (ahr1) mutant of Arabidopsis recovers root hydrotropism with cytokinin
Source: PubMed Central journal article supplement — J Exp Bot. 2012 Mar 21;63(10):3587–601. doi: 10.1093/jxb/ers025 (PMC3388826; doi:10.1093/jxb/ers025), 2012-03-21

Supplemental Fig. S1

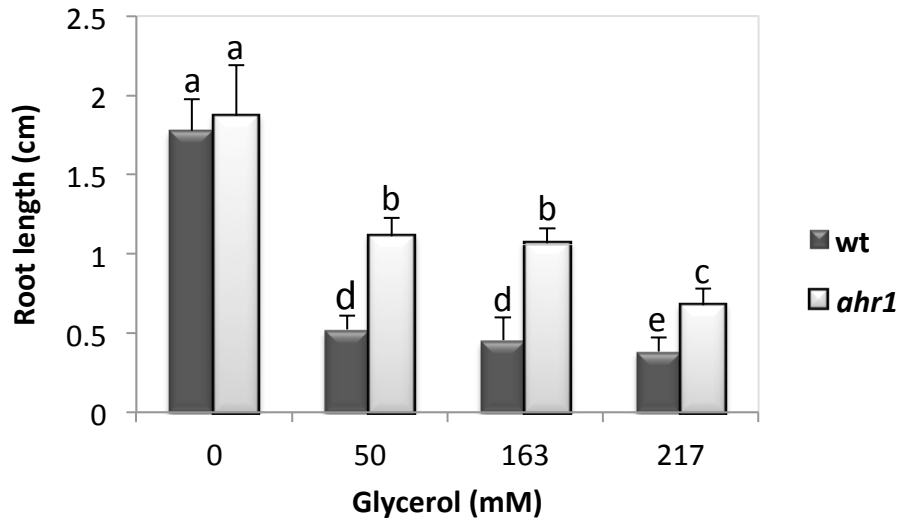

A

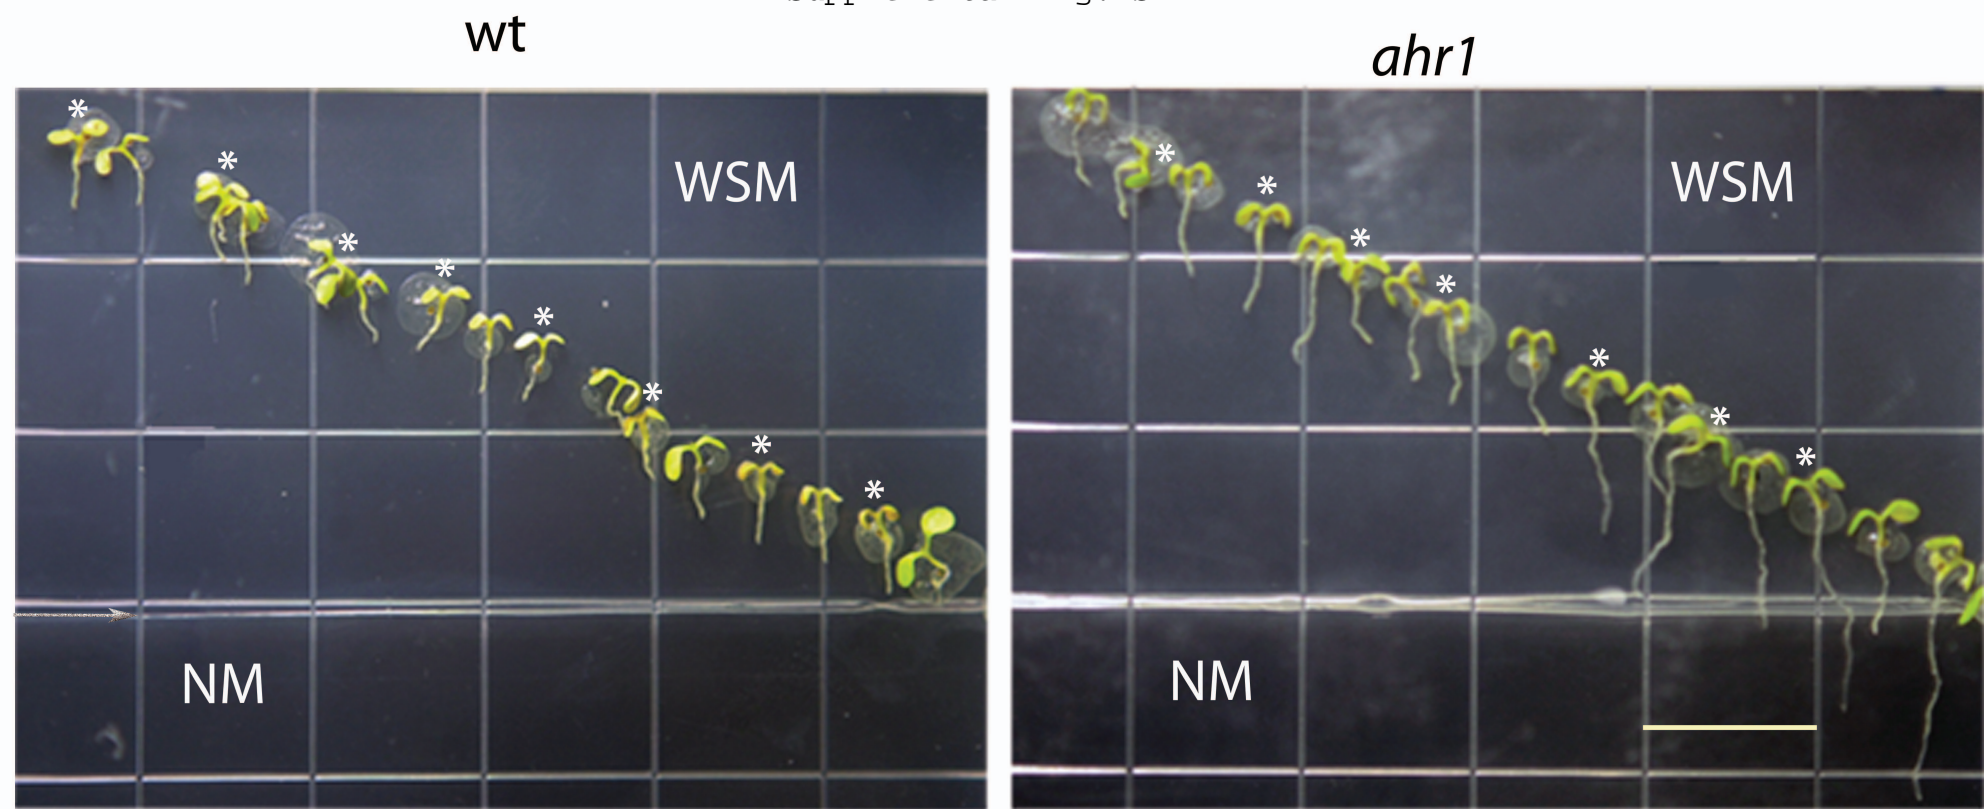

B

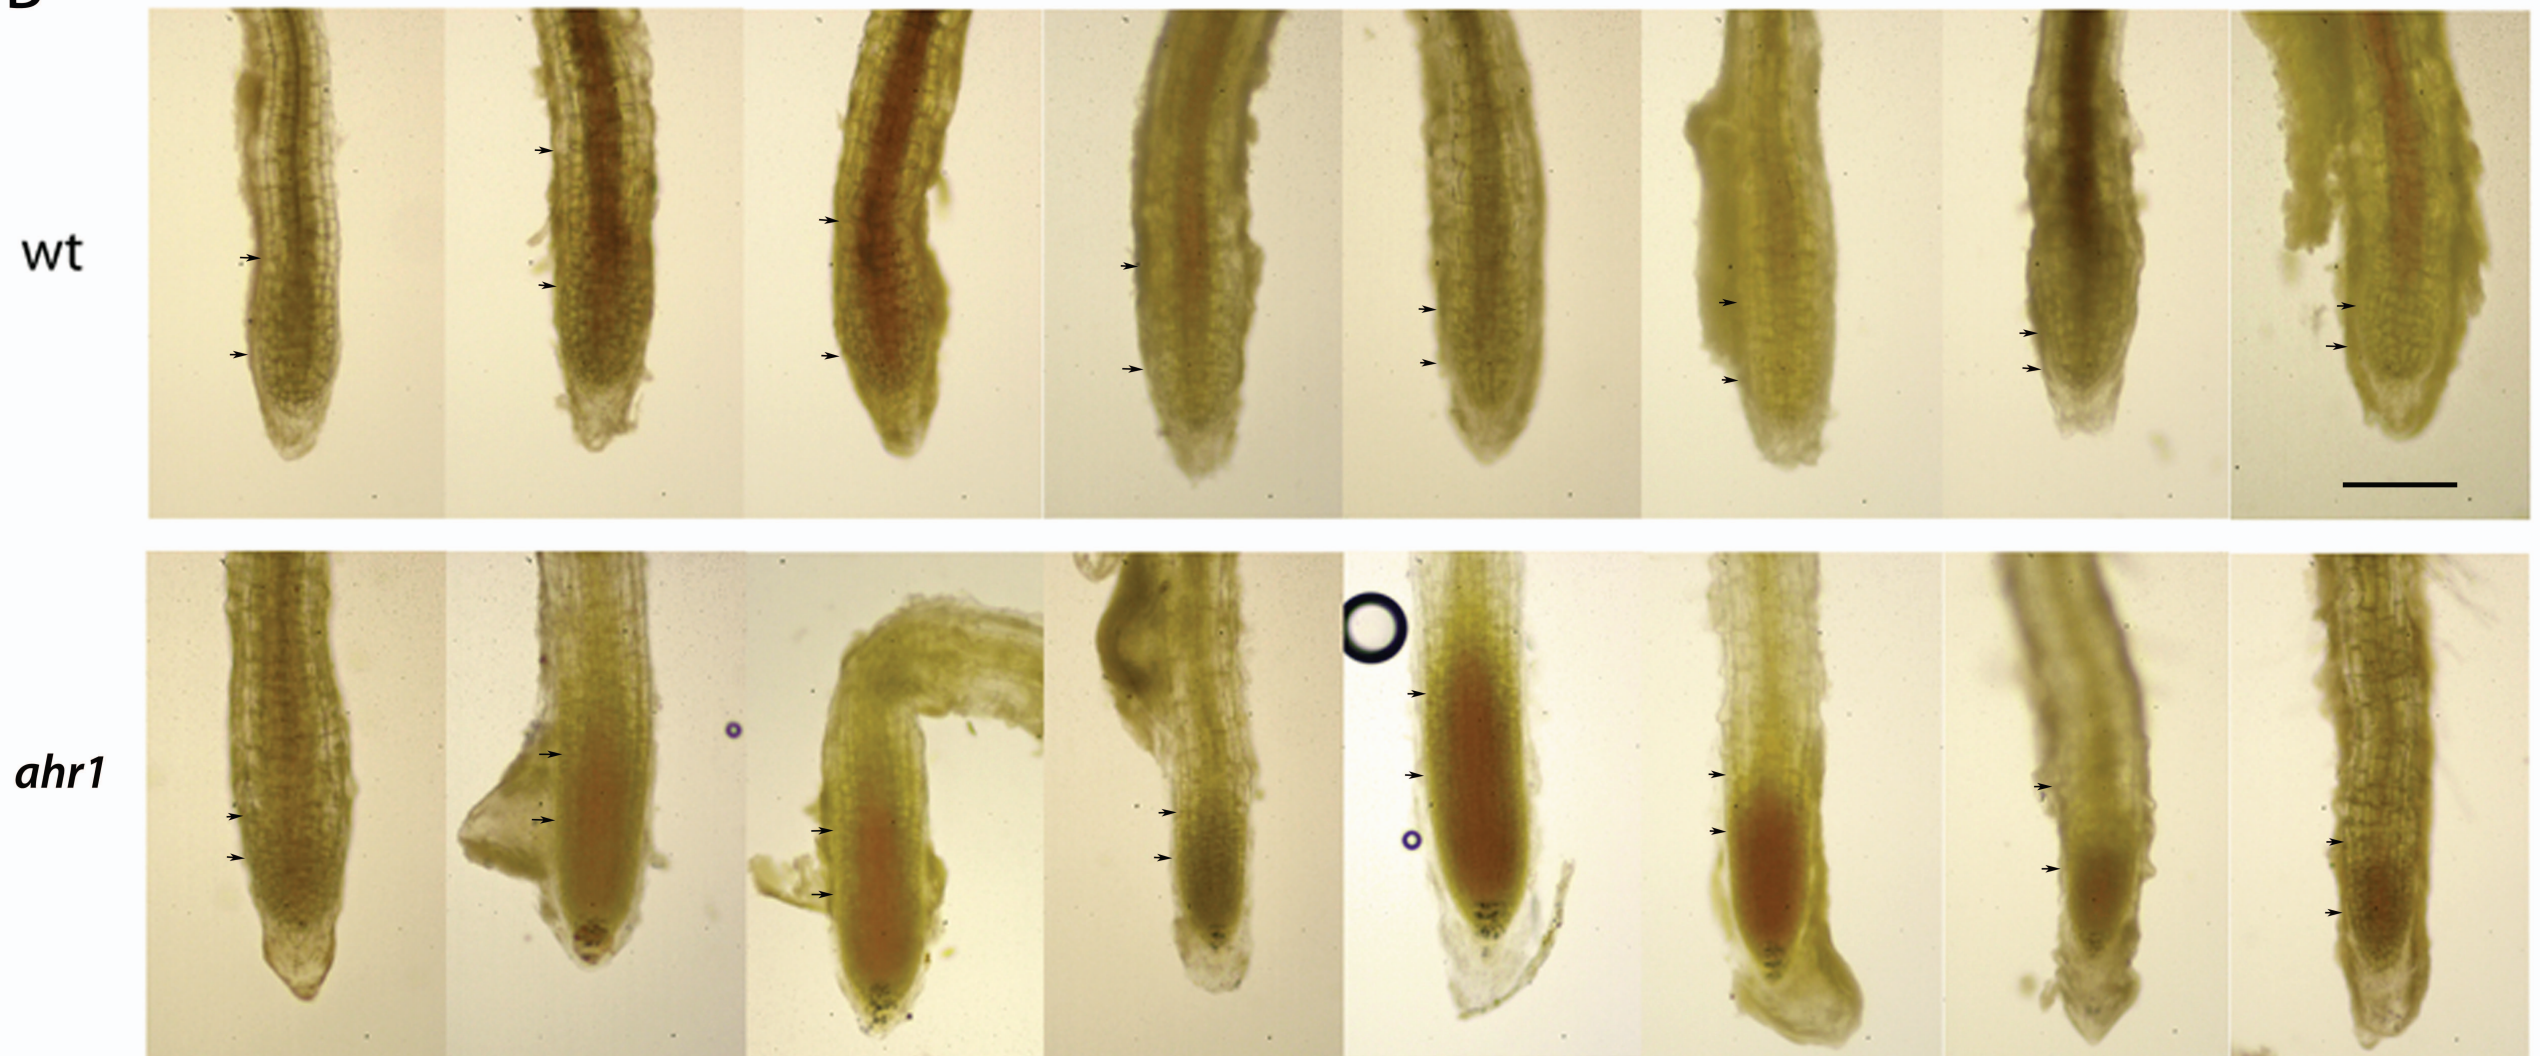

Supplemental Fig. S3

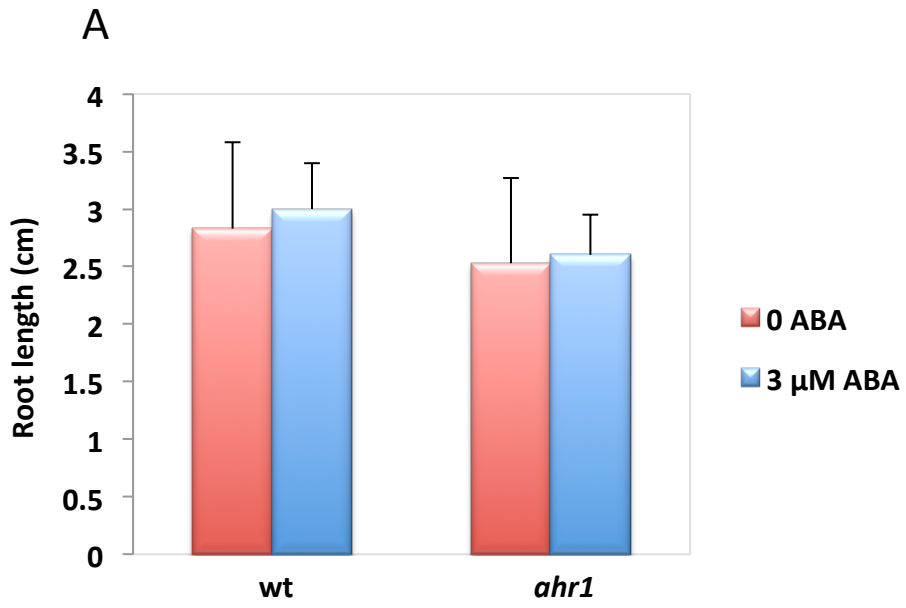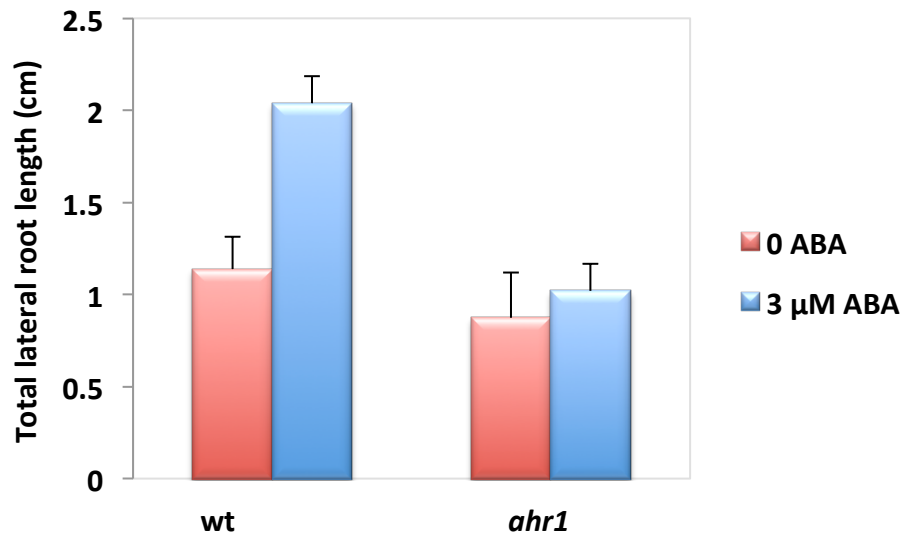

*ahr1**nhr1*

wt

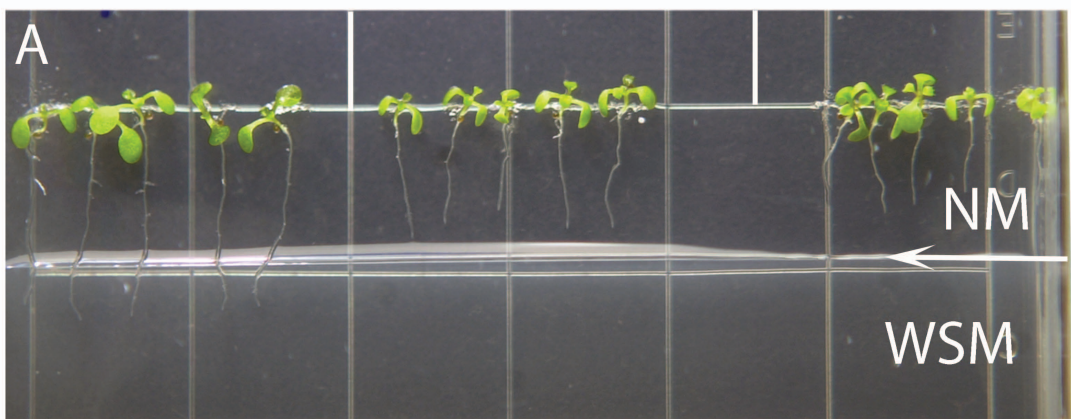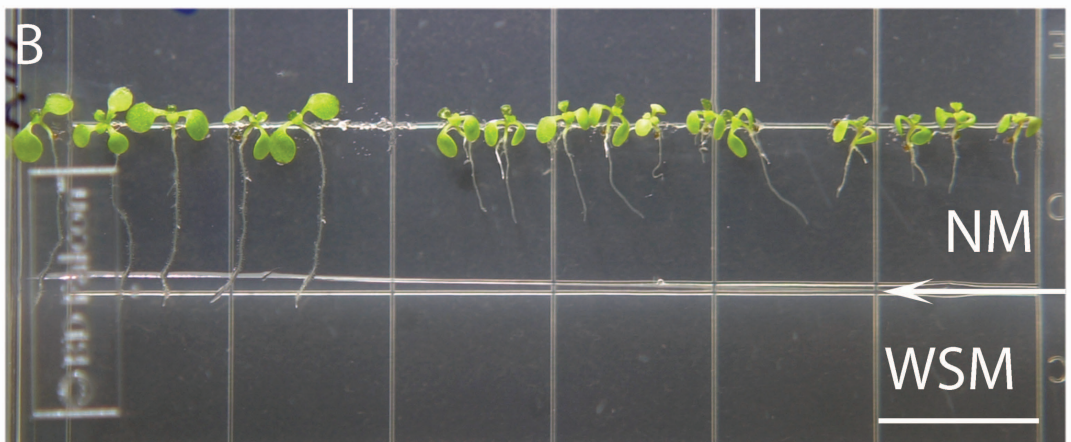**C**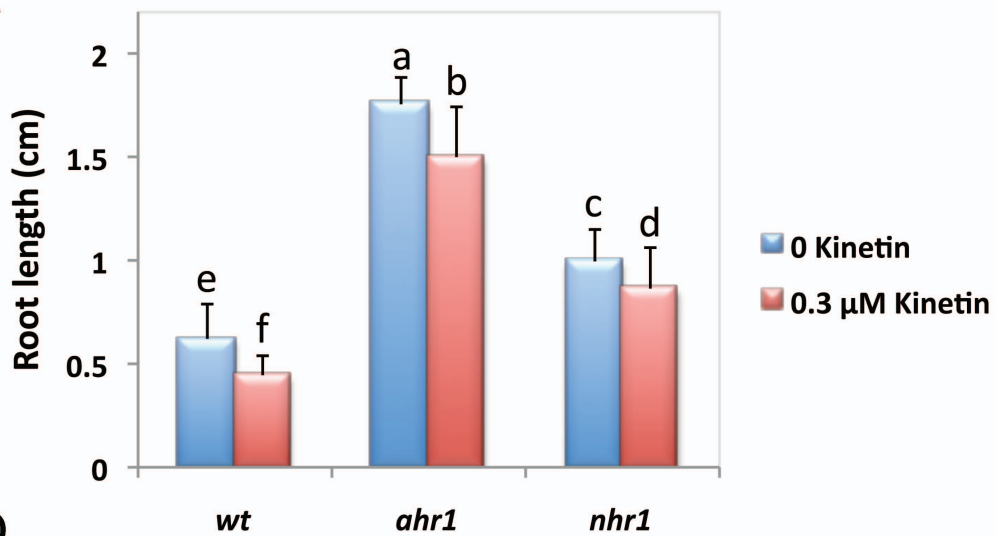**D**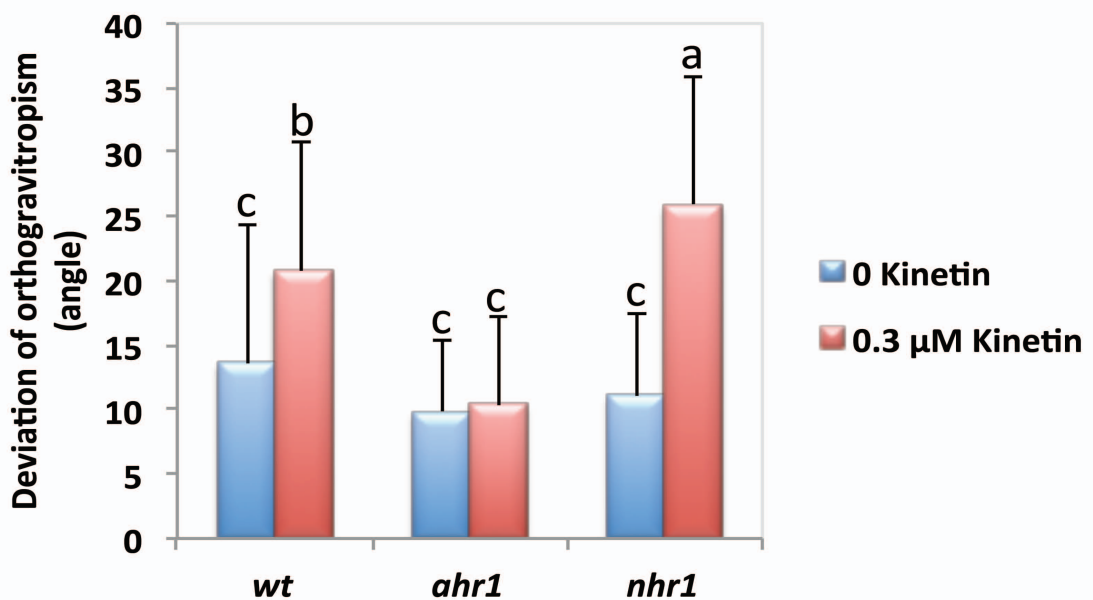

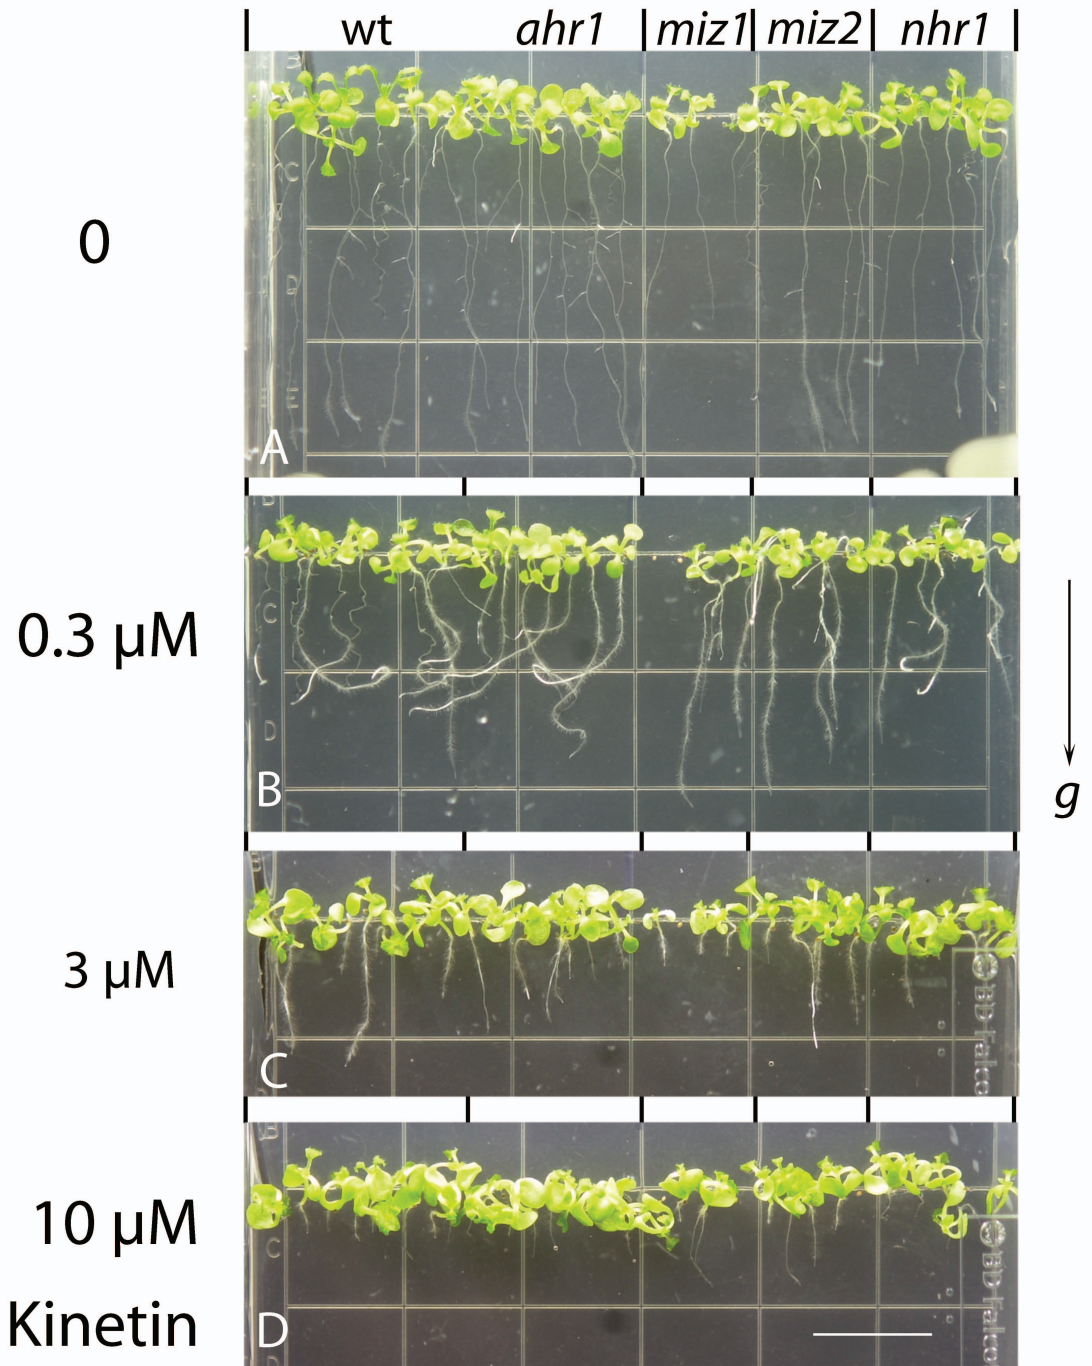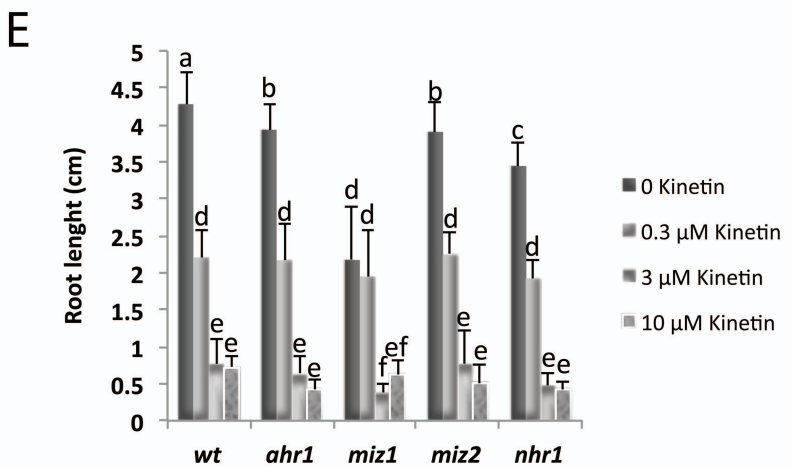

A

0 Kinetin

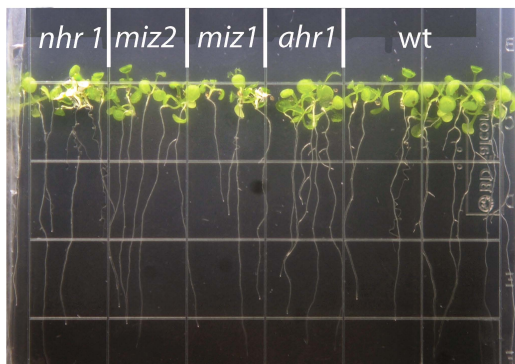

B

0.3  $\mu$ M Kinetin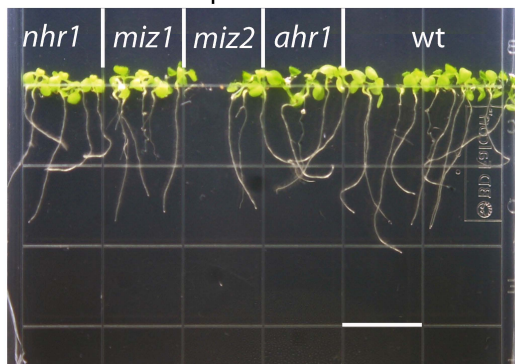

C

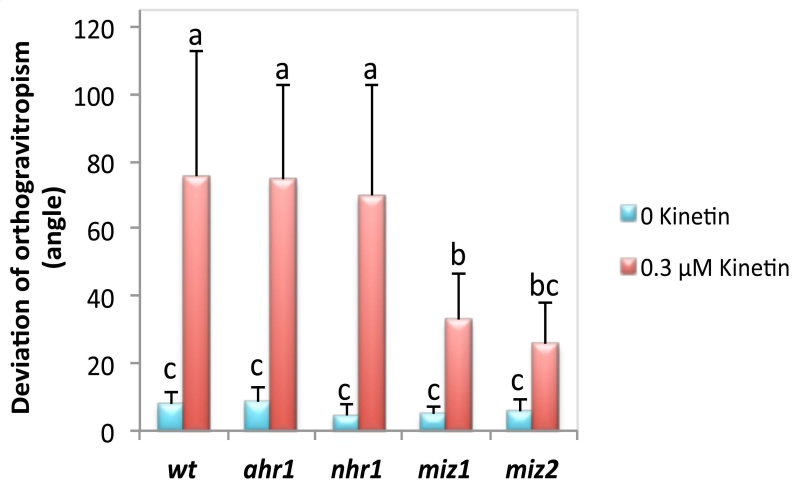

*ahr1*

wt

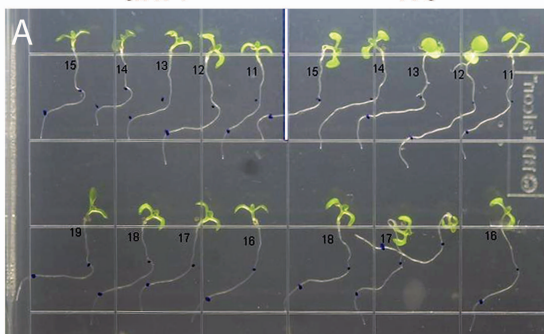

0

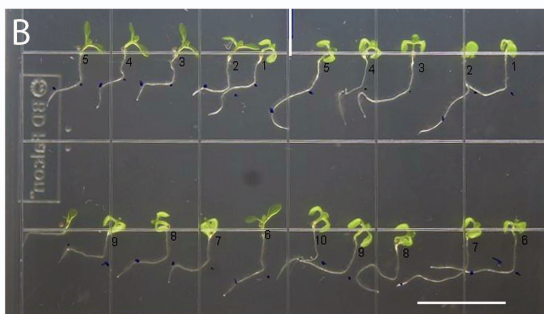0.3  $\mu$ M  
Kinetin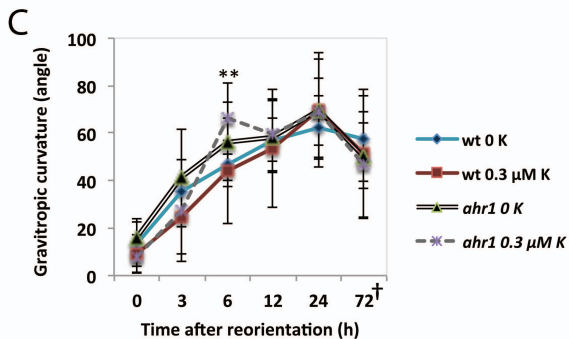

0

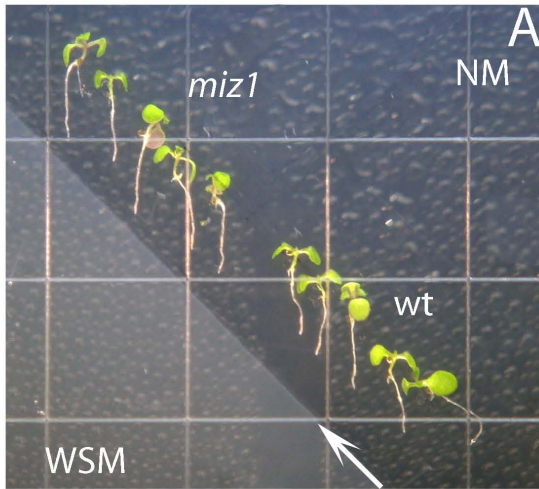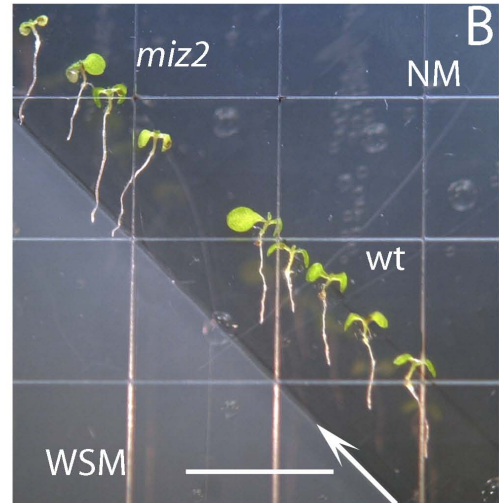

0.3  $\mu$ M  
Kinetin

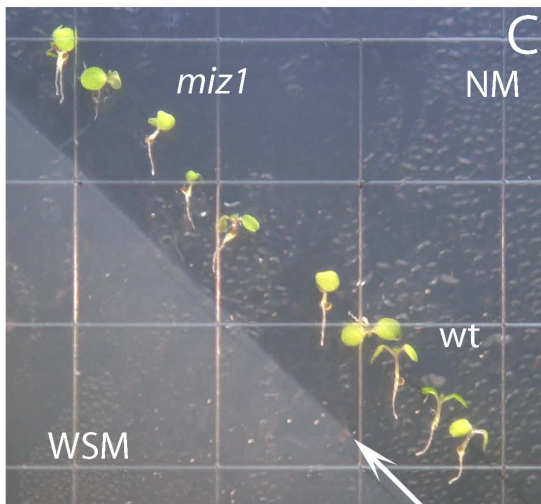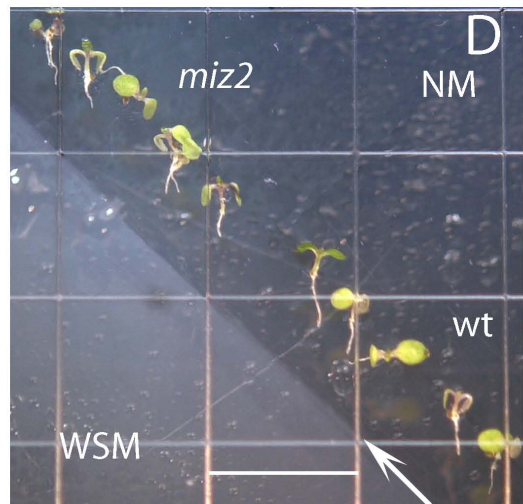



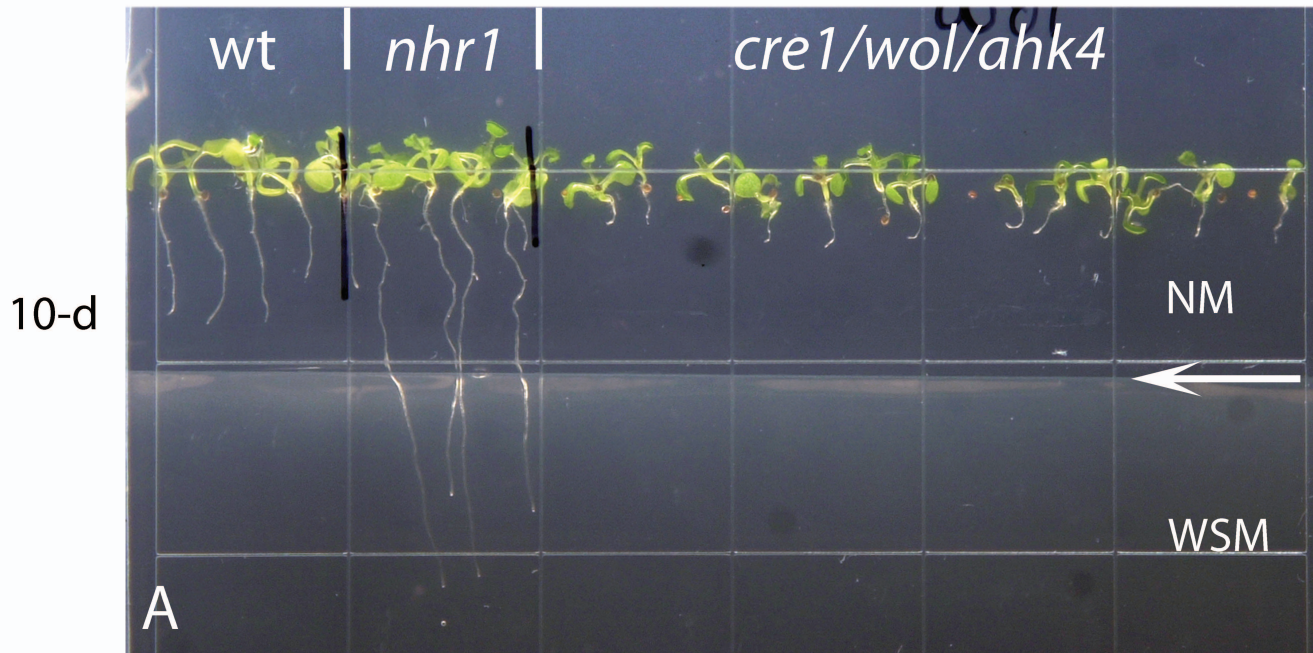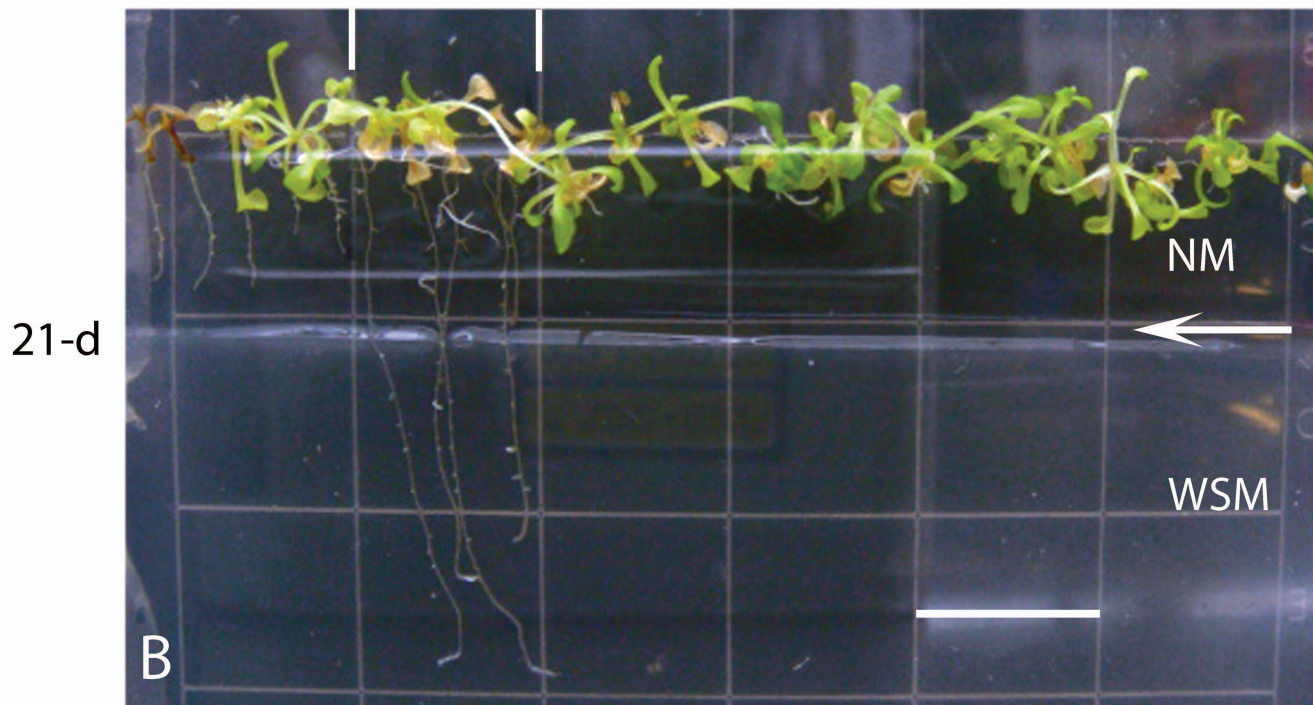

Supplemental Fig. S10

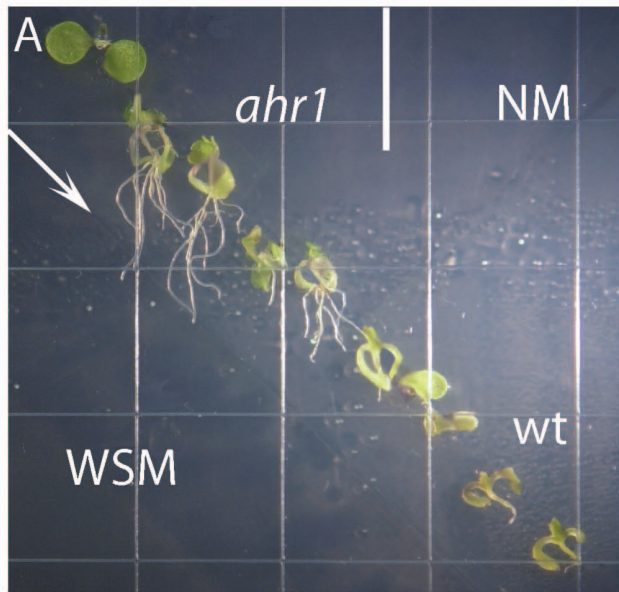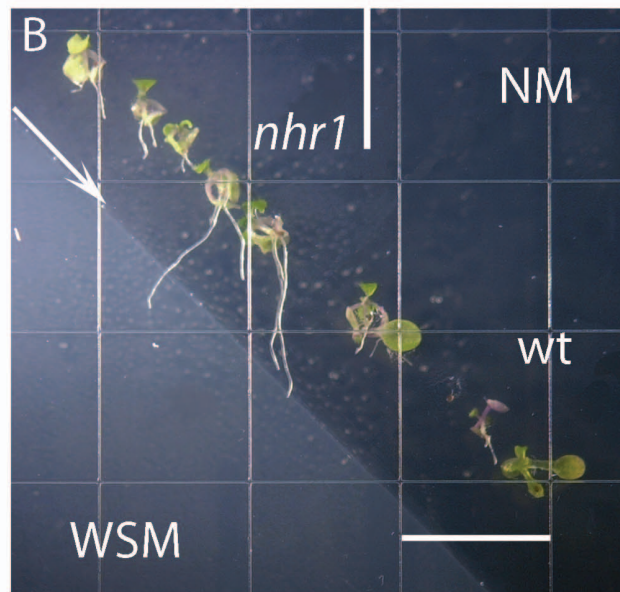

# Supplemental Fig. S11

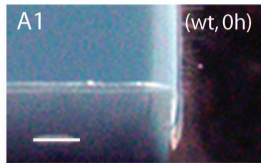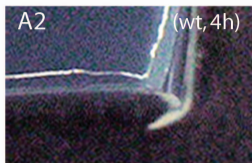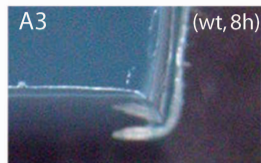

$g$

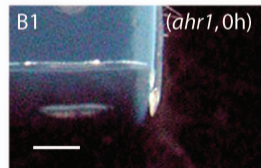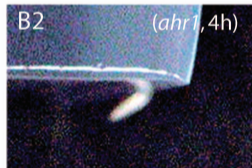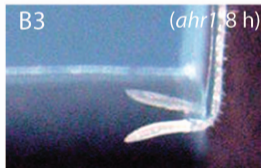

Supplement: supp_ers025_00074609-file001.pdf [file supp_ers025_00074609-file001.pdf]
